# Supplementary material for: Multi-photon in situ synthesis and patterning of polymer-embedded nanocrystals
Source: Royal Society of Chemistry journal article supplement (doi:10.1039/c2jm16625a), 2012-01-01
Supplement: c2jm16625a.pdf [file c2jm16625a.pdf]

## Supplementary Information

### Multi-photon *in-situ* synthesis and patterning of polymer-embedded nanocrystals

Andrea Camposeo,<sup>\*a</sup> Marco Polo,<sup>a</sup> Antonio A. R. Neves,<sup>a</sup> Despina Fragouli,<sup>b</sup> Luana Persano,<sup>a</sup> S. Molle,<sup>a</sup> Anna M. Laera,<sup>c</sup> Emanuela Piscopiello,<sup>c</sup> Vincenzo Resta,<sup>c</sup> Athanassia Athanassiou,<sup>abd</sup> Roberto Cingolani,<sup>d</sup> Leander Tapfer<sup>c</sup> and Dario Pisignano<sup>\*abe</sup>

<sup>a</sup> National Nanotechnology Laboratory, Istituto Nanoscienze-CNR, via Arnesano, 73100 Lecce, Italy E-mail: [andrea.camposeo@nano.cnr.it](mailto:andrea.camposeo@nano.cnr.it).

<sup>b</sup> Center for Biomolecular Nanotechnologies, Istituto Italiano di Tecnologia @ UNILE, via Barsanti 1, I-73010 Arnesano (LE), Italy.

<sup>c</sup> ENEA, Technical Unit for Brindisi Material Technologies (UTTMATB), SS7 Appia Km 706 I-72100 Brindisi, Italy.

<sup>d</sup> Istituto Italiano di Tecnologia (I.I.T.), via Morego 30, I-16163, Genova, Italy.

<sup>e</sup> Dipartimento di Ingegneria dell'Innovazione, Università del Salento, via Arnesano, I-73100 Lecce, Italy, e-mail: [dario.pisignano@unisalento.it](mailto:dario.pisignano@unisalento.it)

## 1. Rheological Characterization

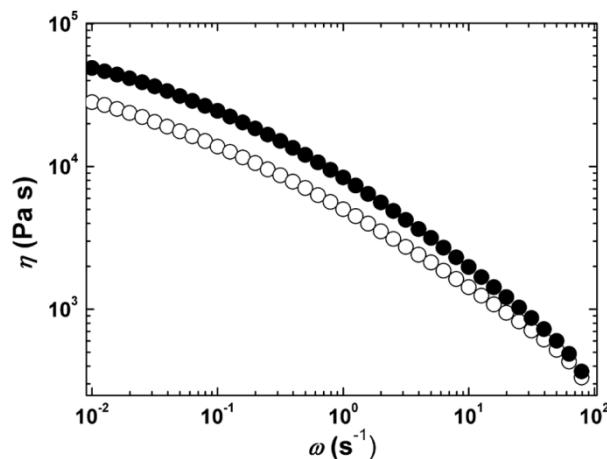

**Figure S1.** Frequency dependence of viscosity,  $\eta$ , of the TOPAS<sup>®</sup>-C12 composite before (empty circles) and after (full circles) a thermal treatment at 250 °C.

Rheological measurements are carried out by a rotational rheometer (TA Instruments Inc., New Castle, DE). Samples of TOPAS<sup>®</sup>-C12, before and after thermal treatment at 250 °C, are prepared as disks of about 1 mm thickness and 25 mm diameter, and studied using a parallel plate geometry, at 170 °C under nitrogen atmosphere.

## 2. Elemental analysis.

The energy dispersive X-ray spectroscopy (EDS) is performed by using a NOVA NANO 450 scanning electron microscopy system (SEM, FEI), equipped with a QUANTAX (Bruker) detector. Figures S2a-d show the C, O, Cd and S elemental maps, measured after the in-situ synthesis by the laser exposure, displaying almost uniform dispersion of the Cd and S elements in the nanocomposite.

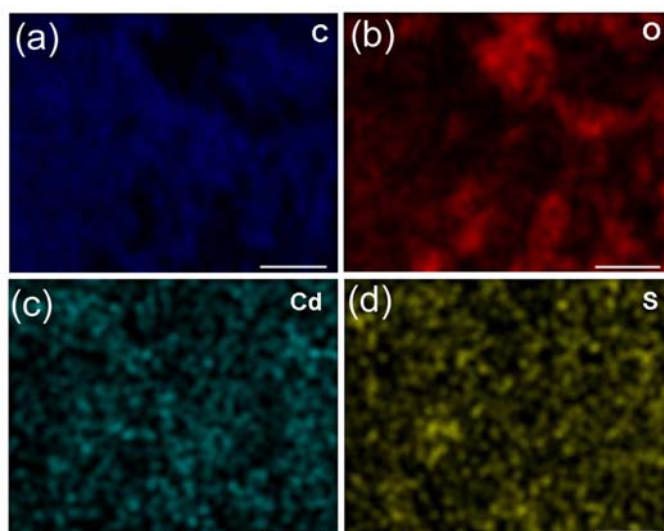

**Figure S2.** (a)-(d) Maps of the intensity of the peaks characteristic of C, O, Cd and S, respectively. Marker: 80  $\mu\text{m}$ .
